# Supplementary material for: Relationship between Student’s Self-Determination, Parental Involvement, Special Education Teachers’ Support, and College and Career Readiness among Secondary Students with Learning Disabilities in Riyadh, Kingdom of Saudi Arabia
Source: MDPI journal article supplement (doi:10.3390/su142114221), 2022-10-31
Supplement: s1 [file s1]

A questionnaire of self-determination, parental involvement in learning disabilities programmes, special education teachers' support for non-academic skills, and college and career readiness for secondary students with learning disabilities

*Dear Student,*

May peace, mercy and blessings of Allah be upon you,

You are invited to participate in this questionnaire which aims at identifying the relationship between your self-determination, parental involvement in your Transitional Services Program, support provided to you by special education teachers, and your readiness for college or future career. I would like to thank you in advance for responding to this questionnaire. You are required to read each phrase carefully and respond to it, taking into consideration that there is no correct and wrong answer and that the questionnaire grades range from 1 to 5.

This questionnaire consists of the following sections:

- (A) General Information
- (B) Questions about your self-determination.
- (C) Questions about the parents' involvement in your Transitional Services Program.
- (D) Questions about the special education teachers' methods and practices to develop your non-academic skills.
- (E) Questions about your readiness for college or career.

The questionnaire is going to take 10 to 15 minutes for you to answer.

Thank you in advance for your participation

**(A): Primary Information**

Name (optional)

Sex: Male ( ) Female ( )

Class: First secondary ( ) Second secondary ( ) Third secondary ( )

School Name (optional):

Email (optional):

|                                                                                                                                                                                                                                                                                                           | Phrase                                                                            | I strongly agree | I agree | I fairly agree | I disagree | I strongly disagree |
|-----------------------------------------------------------------------------------------------------------------------------------------------------------------------------------------------------------------------------------------------------------------------------------------------------------|-----------------------------------------------------------------------------------|------------------|---------|----------------|------------|---------------------|
| <b>(B): Students' Self-determination:</b><br>It means the ability to determine your academic and social objectives, to believe in your ability to achieve such objectives, your ability to monitor yourself and act independently, as well as your understanding of your points of weakness and strength. |                                                                                   |                  |         |                |            |                     |
| 1                                                                                                                                                                                                                                                                                                         | I am always committed to being on time without delay.                             |                  |         |                |            |                     |
| 2                                                                                                                                                                                                                                                                                                         | I can prepare a snack meal for myself before going to school.                     |                  |         |                |            |                     |
| 3                                                                                                                                                                                                                                                                                                         | I can choose what to wear on different occasions.                                 |                  |         |                |            |                     |
| 4                                                                                                                                                                                                                                                                                                         | I can invest my free time to do what benefits me.                                 |                  |         |                |            |                     |
| 5                                                                                                                                                                                                                                                                                                         | I can spend all my pocket money without excess.                                   |                  |         |                |            |                     |
| 6                                                                                                                                                                                                                                                                                                         | I can express my different needs to my parents or teachers.                       |                  |         |                |            |                     |
| 7                                                                                                                                                                                                                                                                                                         | I am aware of my points of strength and can use them to develop myself.           |                  |         |                |            |                     |
| 8                                                                                                                                                                                                                                                                                                         | I can express my feelings of joy or sadness appropriately based on the situation. |                  |         |                |            |                     |

|                                                                                                                                                                                                                                                                                                                                                                                                        |                                                                                          |  |  |  |  |  |
|--------------------------------------------------------------------------------------------------------------------------------------------------------------------------------------------------------------------------------------------------------------------------------------------------------------------------------------------------------------------------------------------------------|------------------------------------------------------------------------------------------|--|--|--|--|--|
| 9                                                                                                                                                                                                                                                                                                                                                                                                      | I have a plan for achieving my future goals.                                             |  |  |  |  |  |
| 10                                                                                                                                                                                                                                                                                                                                                                                                     | I have alternative plans in case my first plan does not work out.                        |  |  |  |  |  |
| 11                                                                                                                                                                                                                                                                                                                                                                                                     | I am self-reliant in learning any skills I want to master, such as painting and cooking. |  |  |  |  |  |
| 12                                                                                                                                                                                                                                                                                                                                                                                                     | I can express my opinion with confidence to my friends or others.                        |  |  |  |  |  |
| 13                                                                                                                                                                                                                                                                                                                                                                                                     | I can cooperate well with others in teamwork.                                            |  |  |  |  |  |
| 14                                                                                                                                                                                                                                                                                                                                                                                                     | I can make friends at school, club, or any other place.                                  |  |  |  |  |  |
| 15                                                                                                                                                                                                                                                                                                                                                                                                     | I can understand and accept others' opinions, even if I'm not convinced of them.         |  |  |  |  |  |
| 16                                                                                                                                                                                                                                                                                                                                                                                                     | I constantly discuss my interests and my future goals with my parents.                   |  |  |  |  |  |
| 17                                                                                                                                                                                                                                                                                                                                                                                                     | I have previously participated in volunteer work at school or in a summer club.          |  |  |  |  |  |
| <b>(C): Parental involvement in Transitional Services Program:</b><br>A parent involvement extent in your Transitional Services Program means that a parent interacts and exchanges his/her views in a range of activities and programs designed to develop several aspects for your life, i.e., academic, physiological, social, in order to benefit you in achieving your desired future objectives. |                                                                                          |  |  |  |  |  |
| 1                                                                                                                                                                                                                                                                                                                                                                                                      | My parents communicate periodically with a special education teacher.                    |  |  |  |  |  |

|                                                                                                                                                                   |                                                                                                                                                                   |  |  |  |  |  |
|-------------------------------------------------------------------------------------------------------------------------------------------------------------------|-------------------------------------------------------------------------------------------------------------------------------------------------------------------|--|--|--|--|--|
| 2                                                                                                                                                                 | My parents are aware of transitional services provided to me.                                                                                                     |  |  |  |  |  |
| 3                                                                                                                                                                 | My parents are satisfied with the level of transitional services provided to me.                                                                                  |  |  |  |  |  |
| 4                                                                                                                                                                 | My parents' opinion and suggestions are taken into consideration in the Transitional Services Program.                                                            |  |  |  |  |  |
| 5                                                                                                                                                                 | My parents care about the school's interest in preparing me for college or career.                                                                                |  |  |  |  |  |
| 6                                                                                                                                                                 | My parents help the school in developing the skills that are important for my future.                                                                             |  |  |  |  |  |
| 7                                                                                                                                                                 | My special education teachers and school management always encourage my parents' involvement in the programs provided to develop my skills in different aspects.  |  |  |  |  |  |
| <b>(D): Supporting special education teachers in developing student's non-academic skills:</b>                                                                    |                                                                                                                                                                   |  |  |  |  |  |
| It means effective educational practices/techniques practiced by your special education teacher to develop personal and social aspects important for your career. |                                                                                                                                                                   |  |  |  |  |  |
| 1                                                                                                                                                                 | My special education teacher offers courses or lectures to help me develop non-academic skills, as college or career preparation skills, self-determination, etc. |  |  |  |  |  |
| 2                                                                                                                                                                 | I like to consult my special education teacher about my future goals and my plans for developing myself.                                                          |  |  |  |  |  |
| 3                                                                                                                                                                 | My special education teacher's consultations and advice encourage me to achieve my goals and develop myself.                                                      |  |  |  |  |  |
| 4                                                                                                                                                                 | My special education teacher does not hesitate to help me with my non-academic goals whenever I need.                                                             |  |  |  |  |  |
| 5                                                                                                                                                                 | My special education teacher communicates with one of my parents (or both) to advise them on the tips necessary for any non-academic skills I need to improve.    |  |  |  |  |  |

|                                                                                                                                                                                     |                                                                                                                              |  |  |  |  |  |
|-------------------------------------------------------------------------------------------------------------------------------------------------------------------------------------|------------------------------------------------------------------------------------------------------------------------------|--|--|--|--|--|
| 6                                                                                                                                                                                   | My special education teacher communicates with general classroom teachers to support me psychologically.                     |  |  |  |  |  |
| <b>(E): College and Career Readiness:</b><br>It means your readiness for post-secondary school, your understanding and possession of the requirements of college studies or career. |                                                                                                                              |  |  |  |  |  |
| 1                                                                                                                                                                                   | I know how well I am prepared for college or vocation.                                                                       |  |  |  |  |  |
| 2                                                                                                                                                                                   | Secondary schools should be keen about developing the skills that prepare me and my colleagues for college or future career. |  |  |  |  |  |
| 3                                                                                                                                                                                   | I participate in summer courses or programs to develop necessary skills that prepare me for college or future career.        |  |  |  |  |  |
| 4                                                                                                                                                                                   | I am satisfied with my readiness for college and future career.                                                              |  |  |  |  |  |
| 5                                                                                                                                                                                   | I am quite aware of the college and vocational career requirements that match my capacities and interests.                   |  |  |  |  |  |

A questionnaire of self-determination, parental involvement in learning disabilities programmes, special education teachers' support for non-academic skills, and college and career readiness for secondary students with learning disabilities from their parents' perspectives

*Dear Parent*

May peace, mercy and blessings of Allah be upon you,

You are kindly invited to participate in this questionnaire which aims at identifying the levels of self-determination, parental involvement in your Transitional Services Program, support of special education teachers, and your readiness to contribute to preparing your child for college or career. I would like to thank you in advance for responding to this questionnaire. You are required to read each phrase carefully and respond to it, taking into consideration that there is no correct and wrong answer, and that the questionnaire grades range from 1 to 5.

This questionnaire consists of the following sections:

- (A) General Information
- (B) Questions about your son/daughter's self-determination
- (C) Questions about your participation in your son/daughter's Transitional Services Program.
- (D) Questions about special education teachers' methods and practices to develop your son/daughter's non-academic skills.
- (E) Questions about your son/daughter's readiness for college or career.

The questionnaire is going to take 10 to 15 minutes for you to answer.

Thank you in advance for your participation

Researcher Norah Saleh Ben Ghashayan

[norah.alghashayan@gmail.com](mailto:norah.alghashayan@gmail.com)

**Primary Information**

Name: (Optional)

Sex: Male ( ) Female ( )

Educational Level: Bachelor Degree ( ) Master Degree ( ) PhD ( )

Email: (Optional)

|                                                                                                                                                                                                                                                                                                                                                  | Phrase                                                                    | I strongly agree | I agree | I fairly agree | I disagree | I strongly disagree |
|--------------------------------------------------------------------------------------------------------------------------------------------------------------------------------------------------------------------------------------------------------------------------------------------------------------------------------------------------|---------------------------------------------------------------------------|------------------|---------|----------------|------------|---------------------|
| <b>(B): Students' Self-determination:</b><br>It means your son/daughter's ability to identify his/her personal, academic and social objectives, to believe in his or her ability to achieve them, his/her ability to monitor himself/herself and act independently, as well as his/her understanding of his/her points of weakness and strength. |                                                                           |                  |         |                |            |                     |
| 1                                                                                                                                                                                                                                                                                                                                                | My son/daughter is always committed to being on time without delay.       |                  |         |                |            |                     |
| 2                                                                                                                                                                                                                                                                                                                                                | My son/daughter can prepare a snack meal for himself/herself.             |                  |         |                |            |                     |
| 3                                                                                                                                                                                                                                                                                                                                                | My son/daughter can choose what to wear on different occasions.           |                  |         |                |            |                     |
| 4                                                                                                                                                                                                                                                                                                                                                | My son/daughter invests free time for his/her benefit.                    |                  |         |                |            |                     |
| 5                                                                                                                                                                                                                                                                                                                                                | My son/daughter can spend all his/her pocket money without excess.        |                  |         |                |            |                     |
| 6                                                                                                                                                                                                                                                                                                                                                | My son/daughter can express his/her different needs well to other people. |                  |         |                |            |                     |

|    |                                                                                                                       |  |  |  |  |  |
|----|-----------------------------------------------------------------------------------------------------------------------|--|--|--|--|--|
| 7  | My son/daughter knows his/her points of strength and can use them to develop himself/herself.                         |  |  |  |  |  |
| 8  | My son/daughter can express his/her feelings of joy or sadness appropriately in different situations.                 |  |  |  |  |  |
| 9  | My son/daughter has a plan to achieve his/her future goals.                                                           |  |  |  |  |  |
| 10 | My son/daughter has alternative plans in case the first plan does not work out.                                       |  |  |  |  |  |
| 11 | My son/daughter and I have a picture in mind of what he/she will be in the doing in three years to come, God willing. |  |  |  |  |  |
| 12 | My son/daughter has the ability to learn any hobby or skill he/she wishes to master such as painting and cooking.     |  |  |  |  |  |
| 13 | My son/daughter has the ability to express his/her opinion with confidence to friends or others.                      |  |  |  |  |  |
| 14 | My son/daughter has the ability to cooperate well in teamwork.                                                        |  |  |  |  |  |
| 15 | My son/daughter has the ability to make friends in school or in club or anywhere else.                                |  |  |  |  |  |
| 16 | My son/daughter has the ability to understand and accept others' opinions even if not convinced of them.              |  |  |  |  |  |
| 17 | My son/daughter has previously participated in volunteer work at school or in a summer club.                          |  |  |  |  |  |

**(C): Parental involvement in transitional services:**

Your participation and cooperation in your child's Transitional Services Program means: Parental interaction and exchange of views in a range of activities and programs designed to develop several aspects of your son/daughter's life, i.e., academic, physiological, social, in order to benefit him/her in achieving his/her desired future objectives.



|                                                                                                                                                                                                                                                                                   |                                                                                                                                                                                      |  |  |  |  |  |
|-----------------------------------------------------------------------------------------------------------------------------------------------------------------------------------------------------------------------------------------------------------------------------------|--------------------------------------------------------------------------------------------------------------------------------------------------------------------------------------|--|--|--|--|--|
| 1                                                                                                                                                                                                                                                                                 | I communicate periodically with my child's special education teacher.                                                                                                                |  |  |  |  |  |
| 2                                                                                                                                                                                                                                                                                 | I know what transitional services are.                                                                                                                                               |  |  |  |  |  |
| 3                                                                                                                                                                                                                                                                                 | I am satisfied with the level of transitional services provided to my son/daughter.                                                                                                  |  |  |  |  |  |
| 4                                                                                                                                                                                                                                                                                 | I participate in setting special goals for my son/daughter in the Transitional Services Program.                                                                                     |  |  |  |  |  |
| 5                                                                                                                                                                                                                                                                                 | My opinion or recommendations are taken into consideration by the Transitional Services Program.                                                                                     |  |  |  |  |  |
| 6                                                                                                                                                                                                                                                                                 | I am interested in providing my son/daughter with the important skills that prepare him for college and future career.                                                               |  |  |  |  |  |
| 7                                                                                                                                                                                                                                                                                 | I share the school its interest in providing my son with those skills.                                                                                                               |  |  |  |  |  |
| 8                                                                                                                                                                                                                                                                                 | Special education teacher and school management always encourage my involvement in the programs provided to my son/daughter to develop his/her skills in different aspects of life.  |  |  |  |  |  |
| 9                                                                                                                                                                                                                                                                                 | I realize that my involvement in the transitional service program is very important for the benefit of my son/daughter.                                                              |  |  |  |  |  |
| <b>(D): Supporting special education teachers in developing student's non-academic skills:</b><br>It means effective educational practices/techniques practiced by the special education teacher to develop personal and social aspects important for your son/daughter's career. |                                                                                                                                                                                      |  |  |  |  |  |
| 1                                                                                                                                                                                                                                                                                 | The special education teacher offers courses or lectures to help my son/daughter to develop non-academic skills, as college or career preparation skills, self-determination, etc.). |  |  |  |  |  |
| 2                                                                                                                                                                                                                                                                                 | My son/daughter does not hesitate to discuss his/her future goals with teachers of students with learning disabilities.                                                              |  |  |  |  |  |

|   |                                                                                                                                                                          |  |  |  |  |  |
|---|--------------------------------------------------------------------------------------------------------------------------------------------------------------------------|--|--|--|--|--|
| 3 | The special education teacher does not hesitate to help my son/daughter in non-academic matters whenever my son/daughter needs help or guidance.                         |  |  |  |  |  |
| 4 | The special education teacher updates me with the development of my son/daughter in non-academic aspects based on the written plan of the transitional services program. |  |  |  |  |  |
| 5 | The special education teacher communicates with me to give tips on what my son/daughter needs in terms of the development of non-academic skills.                        |  |  |  |  |  |

**(E): College and Career Readiness**

It means your son/daughter's readiness for post-secondary school and his/her understanding and possession of the requirements of college studies or career in work.

|   |                                                                                                                                                                                                |  |  |  |  |  |
|---|------------------------------------------------------------------------------------------------------------------------------------------------------------------------------------------------|--|--|--|--|--|
| 1 | I am aware that my son/daughter are prepared for college or future career.                                                                                                                     |  |  |  |  |  |
| 2 | Secondary schools should be interested in developing the skills that prepare my son/daughter who has learning disabilities and his/her normally developing peers for college or future career. |  |  |  |  |  |
| 3 | I encourage my son/daughter to participate in courses or summer programs to develop his/her college or career readiness.                                                                       |  |  |  |  |  |
| 4 | I am satisfied with the extent to which my son/daughter are ready for college or future career.                                                                                                |  |  |  |  |  |
| 5 | I am quite familiar with the college and vocational career requirements that match my son/daughter's capacities and interests.                                                                 |  |  |  |  |  |

A questionnaire of self-determination, parental involvement in learning disabilities programmes, special education teachers' support for non-academic skills, and college and career readiness for secondary students with learning disabilities from special education teachers' Perspectives

Dear Special Education Teacher,

May peace, mercy and blessings of Allah be upon you,

You are kindly invited to participate in this questionnaire which aims at identifying the levels of the students' self-determination, parental involvement in the Transitional Services Program, support provided by special education teachers, and the students' readiness for college or future career. I would like to thank you in advance for responding to this questionnaire. You are required to read each phrase carefully and respond to it, taking into consideration that there is no correct and wrong answer, and that the questionnaire grades range from 1 to 5.

This questionnaire consists of the following sections:

- A. General Information
- B. Questions about students' self-determination
- C. Questions about parental involvement in transitional services.
- D. Questions about special education teachers' methods and practices to develop non-academic skills of students with learning disabilities.
- E. Questions about students' readiness for college or future career.

The questionnaire is going to take 10 to 15 minutes.

Thank you in advance for your participation.

Researcher: Norah Saleh Ben Ghashayan

[norah.alghashayan@gmail.com](mailto:norah.alghashayan@gmail.com)

**Section (1): Primary Information**

Name: (Optional)

Sex: Male ( ) Female ( )

Educational Level Bachelor Degree ( ) Master Degree ( ) PhD ( )

Years of experience ( ) year to ( ) years (5) years to (10) years more than (10) years

Email (Optional)

|   | Phrase                                                                                                                                                                                                                                                                                                                                               | I strongly agree | I agree | I fairly agree | I disagree | I strongly disagree |
|---|------------------------------------------------------------------------------------------------------------------------------------------------------------------------------------------------------------------------------------------------------------------------------------------------------------------------------------------------------|------------------|---------|----------------|------------|---------------------|
|   | <b><u>Section (2) Students' Self-determination</u></b><br>It means the student's ability to identify his/her personal, academic and social objectives, to believe in his/her ability to achieve them, his/her ability to monitor himself/herself and act independently, as well as his/her understanding of his/her points of weakness and strength. |                  |         |                |            |                     |
| 1 | The goals set for my students with learning disabilities in the Transitional Services Program include the development of self-determination skills.                                                                                                                                                                                                  |                  |         |                |            |                     |
| 2 | I apply a measurement to my students with learning disabilities that measures their skills in self-determination.                                                                                                                                                                                                                                    |                  |         |                |            |                     |
| 3 | I help the student to know how to choose the proper strategy to achieve his/her goal and change it when it fails to achieve the specified goal.                                                                                                                                                                                                      |                  |         |                |            |                     |
| 4 | The extent to which the skills of my students with learning disabilities in self-determination develop is monitored periodically                                                                                                                                                                                                                     |                  |         |                |            |                     |
| 5 | A student with learning disabilities in secondary schools must have self-determination skills.                                                                                                                                                                                                                                                       |                  |         |                |            |                     |
| 6 | I have supportive strategies that I apply to my students to help them develop self-determination skills.                                                                                                                                                                                                                                             |                  |         |                |            |                     |
| 7 | I help my students to apply self-determination skills in different situations, i.e., at school, home, public places, etc.                                                                                                                                                                                                                            |                  |         |                |            |                     |
| 8 | When writing the plan for the students with learning disabilities, I ensure that the recommendations include guidelines for developing his/her self-determination skills.                                                                                                                                                                            |                  |         |                |            |                     |
| 9 | I guide the students with learning disabilities on how to define their priorities.                                                                                                                                                                                                                                                                   |                  |         |                |            |                     |

|                                                                                                                                                                                                                                                                                                                                                                                  |                                                                                                                                                          |  |  |  |  |  |
|----------------------------------------------------------------------------------------------------------------------------------------------------------------------------------------------------------------------------------------------------------------------------------------------------------------------------------------------------------------------------------|----------------------------------------------------------------------------------------------------------------------------------------------------------|--|--|--|--|--|
| 10                                                                                                                                                                                                                                                                                                                                                                               | I help my students with verifying their competence in time management when performing daily tasks and duties.                                            |  |  |  |  |  |
| <b>Section (3) Parental involvement in transitional services:</b><br>A parent involvement in transitional services means that parents interact and exchange their views on a range of activities and programs designed to develop several aspects of their son/daughter's academic, physiological, social life in order to benefit them in achieving their desired future goals. |                                                                                                                                                          |  |  |  |  |  |
| 1                                                                                                                                                                                                                                                                                                                                                                                | The needs of students with learning disabilities are assessed in the transitional plan in coordination with one of the parents.                          |  |  |  |  |  |
| 2                                                                                                                                                                                                                                                                                                                                                                                | The student's abilities and his/her points of strength are determined in the transitional plan in cooperation with the parents.                          |  |  |  |  |  |
| 3                                                                                                                                                                                                                                                                                                                                                                                | Wishes, preferences and opinions of the students' parents are taken into consideration when preparing a transitional plan.                               |  |  |  |  |  |
| 4                                                                                                                                                                                                                                                                                                                                                                                | A parent participates in achieving the planned goals in the transitional services.                                                                       |  |  |  |  |  |
| 5                                                                                                                                                                                                                                                                                                                                                                                | A parent monitors the student's progress in the transitional plan which is periodically evaluated at the beginning, middle, and end of the year.         |  |  |  |  |  |
| 6                                                                                                                                                                                                                                                                                                                                                                                | A parent participates in writing recommendations that sets out the goals that have been accomplished and those that have not been accomplished.          |  |  |  |  |  |
| <b>Section (4) Supporting special education teachers to develop non-academic skills.</b><br>It means effective educational practices/techniques practiced by the special education teacher to develop personal and social aspects important for the career of his/her students with learning disabilities.                                                                       |                                                                                                                                                          |  |  |  |  |  |
| 1                                                                                                                                                                                                                                                                                                                                                                                | I provide courses and workshops to help the students with learning disabilities to develop self-determination and prepare for college and future career. |  |  |  |  |  |
| 2                                                                                                                                                                                                                                                                                                                                                                                | I support the student when he/she has a psychological or non-academic problem.                                                                           |  |  |  |  |  |
| 3                                                                                                                                                                                                                                                                                                                                                                                | I communicate with one of the student's parents to offer the best solutions for the student's problems.                                                  |  |  |  |  |  |

|                                                                                                                                                                                                                                                  |                                                                                                                                                                                               |  |  |  |  |  |
|--------------------------------------------------------------------------------------------------------------------------------------------------------------------------------------------------------------------------------------------------|-----------------------------------------------------------------------------------------------------------------------------------------------------------------------------------------------|--|--|--|--|--|
| 4                                                                                                                                                                                                                                                | I inform the parent on his/her son/daughter's development in non-academic aspects according to the plan set for him/her in the Transitional Services Program                                  |  |  |  |  |  |
| 5                                                                                                                                                                                                                                                | I communicate on regular basis with general class teachers to support my students psychologically and socially.                                                                               |  |  |  |  |  |
| <b><u>Section (5) College and Career Readiness</u></b><br>It means readiness of the student with learning disabilities for post-secondary school, his/her understanding and possession of the requirements of college studies or career in work. |                                                                                                                                                                                               |  |  |  |  |  |
| 1                                                                                                                                                                                                                                                | The objectives set out in the program include developing the student's readiness for college and career in work.                                                                              |  |  |  |  |  |
| 2                                                                                                                                                                                                                                                | There is a "criterion/test" that determines the student's readiness for college and future career.                                                                                            |  |  |  |  |  |
| 3                                                                                                                                                                                                                                                | I follow up with public education teachers on how to develop the student's readiness for college and career, and his/her readiness as part of the goals of the Transitional Services Program. |  |  |  |  |  |
| 4                                                                                                                                                                                                                                                | I participate with my students in programs, summer courses, or after-school courses to help them develop college and career readiness.                                                        |  |  |  |  |  |
| 5                                                                                                                                                                                                                                                | I help my students to be realize how far they are ready for their college and future career.                                                                                                  |  |  |  |  |  |

استبيان حول تقرير المصير، والمشاركة الوالدية في برنامج صعوبات التعلم، ودعم معلمي صعوبات التعلم في المهارات الغير أكاديمية، والاستعداد للكلية أو المهنة لدى تلميذات /تلاميذ الثانوية من ذوي صعوبات التعلم من وجهة نظرهم

. عزيزي/تي التلميذ /ة

السلام عليكم ورحمة الله وبركاته

بداية أشكر لكم سلفاً على فضلكم بالاستجابة إلى عبارات هذه الاستبانة التي تهدف إلى التعرف على العلاقة بين مهارات تقرير مصير لديك، ومشاركة أحد والديك في برنامج الخدمات الانتقالية الخاص بك، ومدى دعم معلمي / معلمات صعوبات التعلم لك في تطوير الجوانب الغير اكايدمية، واستعدادك للكلية أو المهنة.

أنت/ت مدعوة/ة للمشاركة في هذا الاستبيان، والمطلوب منك قراءة كل عبارة جيداً والاستجابة لها، مع العلم أنه ليس هناك إجابة صحيحة وأخرى خاطئة، وتتراوح درجات الاستبانة بين 1 و 5.

الأقسام الرئيسية لهذا الاستبيان:

أ. معلومات عامة

ب. أسئلة حول تقرير المصير لديك.

ج. أسئلة حول مشاركة أحد والديك في برنامج الخدمات الانتقالية الخاص بك

د. أسئلة حول دعم معلم/ة صعوبات التعلم في تطوير الجوانب الغير أكاديمية.

هـ. أسئلة حول استعدادك للكلية أو العمل.

ستستغرق مشاركتك في الاستبانة ما بين 10 إلى 15 دقيقة.

شكراً مقدماً على مشاركتكم.

الباحثة

نوره صالح بن غشيان

[Norah.alghashayan@gmail.com](mailto:Norah.alghashayan@gmail.com)



القسم الأول: المعلومات الأولية:

الاسم (اختياري):

الجنس:

♂ ذكر      ♂ أنثى

الصف الدراسي:

♂ أول ثانوي      ♂ ثاني ثانوي      ♂ ثالث ثانوي

اسم المدرسة " اختياري "

البريد الإلكتروني:

| <p><b>القسم الثاني: مهارات تقرير المصير:</b><br/>وتعني قدرتك على تحديد أهداف الشخصية، الأكاديمية والاجتماعية، وإيمانك بقدرتك على تحقيقها، وأيضاً مقدرتك على مراقبة ذاتك، وتصرفك باستقلالية، إلى جانب فهمك لجوانب الضعف والقوة لديك.</p> |                                                                       |       |              |          |               |
|-----------------------------------------------------------------------------------------------------------------------------------------------------------------------------------------------------------------------------------------|-----------------------------------------------------------------------|-------|--------------|----------|---------------|
| العبارة                                                                                                                                                                                                                                 | أوافق بشدة                                                            | أوافق | أوافق لحد ما | لا أوافق | لا أوافق بشدة |
| 1                                                                                                                                                                                                                                       | ألتزم دائماً بالحضور في الموعد المحدد بدون تأخير.                     |       |              |          |               |
| 2                                                                                                                                                                                                                                       | أستطيع أن أخضّر وجبة خفيفة لنفسي.                                     |       |              |          |               |
| 3                                                                                                                                                                                                                                       | أستطيع اختيار ما أرتديه من ملابس في مختلف المناسبات.                  |       |              |          |               |
| 4                                                                                                                                                                                                                                       | أستطيع أن استثمر وقت فراغي بما ينفعني.                                |       |              |          |               |
| 5                                                                                                                                                                                                                                       | أستطيع أن أنفق مصروفي بدون إسراف.                                     |       |              |          |               |
| 6                                                                                                                                                                                                                                       | أستطيع أن أعبر عن احتياجاتي المختلفة للأشخاص المناسبة.                |       |              |          |               |
| 7                                                                                                                                                                                                                                       | أعرف نقاط القوة لدي، وأحاول أن أستغلها لتطوير ذاتي.                   |       |              |          |               |
| 8                                                                                                                                                                                                                                       | أستطيع أن أعبر عن مشاعر " الفرح أو الحزن " للآخرين بشكل مناسب للموقف. |       |              |          |               |
| 9                                                                                                                                                                                                                                       | لدي أهداف للمستقبل قد تم التخطيط لتحقيقها.                            |       |              |          |               |
| 10                                                                                                                                                                                                                                      | لدي خطط بديلة في حال أن خطتي الأولى لم تنجح                           |       |              |          |               |

|                                                                                                                                                                                                                                                                                                            |                                                                                       |       |              |          |               |
|------------------------------------------------------------------------------------------------------------------------------------------------------------------------------------------------------------------------------------------------------------------------------------------------------------|---------------------------------------------------------------------------------------|-------|--------------|----------|---------------|
| 11                                                                                                                                                                                                                                                                                                         | يمكنني أن أتعلّم أي مهارة أرغب بممارستها " كالرسم، الطبخ" معتمدا على نفسي في التعلّم. |       |              |          |               |
| 12                                                                                                                                                                                                                                                                                                         | أستطيع أن أقول رأيي بثقة لأصدقائي أو الآخرين.                                         |       |              |          |               |
| 13                                                                                                                                                                                                                                                                                                         | أستطيع أن أتعاون مع الآخرين في العمل الجماعي بشكل مناسب                               |       |              |          |               |
| 14                                                                                                                                                                                                                                                                                                         | أستطيع أن أكوّن صداقات في المدرسة أو النادي أو أي مكان                                |       |              |          |               |
| 15                                                                                                                                                                                                                                                                                                         | أستطيع أن أفهم وأتقبل آراء الآخرين، وإن لم أكن مقتنع/ة بها.                           |       |              |          |               |
| 16                                                                                                                                                                                                                                                                                                         | أتناقش مع أحد والديّ بشكل مستمر عن اهتماماتي وأهدافي المستقبلية.                      |       |              |          |               |
| 17                                                                                                                                                                                                                                                                                                         | سبق أن شاركت في عمل تطوعي في المدرسة أو في أحد النوادي الصيفية.                       |       |              |          |               |
| <p><b>القسم الثالث: مشاركة الوالدين في الخدمات الانتقالية:</b><br/> يقصد بذلك مدى تفاعل والديك في برنامج الخدمات الانتقالية الخاص بك، وأخذ آراءهم في مجموعة من الأنشطة والبرامج المصممة لتطويرك في الجوانب المختلفة (أكاديميا نفسيا، اجتماعيا)، وذلك من أجل تحقيق الأهداف المرجو تحقيقها لك بالمستقبل.</p> |                                                                                       |       |              |          |               |
| العبارة                                                                                                                                                                                                                                                                                                    |                                                                                       |       |              |          |               |
|                                                                                                                                                                                                                                                                                                            | أوافق بشدة                                                                            | أوافق | أوافق لحد ما | لا أوافق | لا أوافق بشدة |
| 1                                                                                                                                                                                                                                                                                                          | يتواصل والديّ بشكل دوري مع معلم صعوبات التعلّم.                                       |       |              |          |               |

|                                                                                                                                                                                                                                  |                                                                                                                                      |  |  |  |  |
|----------------------------------------------------------------------------------------------------------------------------------------------------------------------------------------------------------------------------------|--------------------------------------------------------------------------------------------------------------------------------------|--|--|--|--|
| 2                                                                                                                                                                                                                                | يعلم والديّ بالخدمات الانتقالية التي يتم تقديمها لي.                                                                                 |  |  |  |  |
| 3                                                                                                                                                                                                                                | والديّ راضون عن مستوى الخدمات الانتقالية المقدمة لي.                                                                                 |  |  |  |  |
| 4                                                                                                                                                                                                                                | يؤخذ برأي واقتراحات والديّ في برنامج الخدمات الانتقالية.                                                                             |  |  |  |  |
| 5                                                                                                                                                                                                                                | يشارك والديّ اهتمام المدرسة بما تقوم به لإعدادي للكلية أو المهنة المستقبلية.                                                         |  |  |  |  |
| 6                                                                                                                                                                                                                                | يساعد والديّ المدرسة في اهتمامهم وتطوير المهارات الهامة لمستقبلي.                                                                    |  |  |  |  |
| 7                                                                                                                                                                                                                                | دائماً ما يشجع معلم صعوبات التعلم وإدارة المدرسة على مشاركة والديّ في البرامج المقدمة لي لتطوير في مختلف الجوانب.                    |  |  |  |  |
| <b>القسم الرابع: دعم معلمي صعوبات التعلم لتطوير مهارات التلميذ غير الأكاديمية:</b><br>يقصد بها الممارسات أو الأساليب التربوية الفعالية التي يمارسها معلمك "معلم صعوبات التعلم" لتطوير الجوانب الشخصية والاجتماعية والمهنية لديك. |                                                                                                                                      |  |  |  |  |
| العبارة<br>لا أوافق بشدة      لا أوافق      أوافق لحد ما      أوافق      أوافق بشدة                                                                                                                                              |                                                                                                                                      |  |  |  |  |
| 1                                                                                                                                                                                                                                | يقدم (تقدم) معلم/ة صعوبات التعلم دورات أو محاضرات لتطوير مهاراتي الغير أكاديمية (كاستعدادي للجامعة أو المهنة، أو تقرير المصير، إلخ). |  |  |  |  |
| 2                                                                                                                                                                                                                                | أحب أن استشير معلم/ة صعوبات التعلم وأناقشه/ا في أهدافي المستقبلية والتطوير من ذاتي.                                                  |  |  |  |  |
| 3                                                                                                                                                                                                                                | تشجعتني مشورات ونصائح معلم/ة صعوبات التعلم على تحقيق أهدافي وتطوير ذاتي.                                                             |  |  |  |  |

|                                                                                                                                                                                           |                                                                                                      |       |              |          |               |
|-------------------------------------------------------------------------------------------------------------------------------------------------------------------------------------------|------------------------------------------------------------------------------------------------------|-------|--------------|----------|---------------|
| 4                                                                                                                                                                                         | لا يتردد (تتردد) معلم/ة صعوبات التعلم في مساعدتي في الأمور الغير أكاديمية عندما اطلب منه /منها ذلك.  |       |              |          |               |
| 5                                                                                                                                                                                         | يتواصل معلم /ة صعوبات التعلم مع أحد والدي لإعطائه نصائح فيما احتاجه من تطوير للمهارات الغير أكاديمية |       |              |          |               |
| 6                                                                                                                                                                                         | يتواصل معلم/ة صعوبات التعلم مع معلمين الفصول العام لدعمي نفسيا.                                      |       |              |          |               |
| <b>القسم الخامس: الاستعداد الجامعي والمهني:</b><br>ويقصد به مدى استعدادك لمرحلة ما بعد الثانوية، ومدى معرفتك لمتطلبات الدراسة الجامعية أو العمل المهني، وأيضا مدى امتلاكك لهذه المتطلبات. |                                                                                                      |       |              |          |               |
| العبارة                                                                                                                                                                                   |                                                                                                      |       |              |          |               |
|                                                                                                                                                                                           | أوافق بشدة                                                                                           | أوافق | أوافق لحد ما | لا أوافق | لا أوافق بشدة |
| 1                                                                                                                                                                                         | أعرف مدى استعدادي الجامعي أو المهني                                                                  |       |              |          |               |
| 2                                                                                                                                                                                         | ينبغي أن تهتم المدارس الثانوية بتطوير الاستعداد الجامعي أو المهني لي ولغيري من الزملاء               |       |              |          |               |
| 3                                                                                                                                                                                         | أشارك في دورات أو برامج صيفية لتطوير مهارات تساعدني على الاستعداد الجامعي أو المهني.                 |       |              |          |               |
| 4                                                                                                                                                                                         | أنا راضٍ عن استعدادي الجامعي أو المهني.                                                              |       |              |          |               |
| 5                                                                                                                                                                                         | أعرف جيداً ماهي متطلبات الدراسة الجامعية أو العمل المهني والتي تتوافق مع قدراتي.                     |       |              |          |               |

استبيان حول تقرير المصير، والمشاركة الوالدية في برنامج صعوبات التعلم، ودعم معلمي صعوبات التعلم في المهارات الغير أكاديمية، والاستعداد للكلية أو المهنة لدى تلميذات /تلاميذ الثانوية من ذوي صعوبات التعلم من وجهة نظر والديهم

عزيزي/تي الأب/ الأم

السلام عليكم ورحمة الله وبركاته

بداية أشكر لكم سلفاً على تفضلكم بالاستجابة إلى عبارات هذه الاستبانة التي تهدف إلى التعرف على مستوى مهارة تقرير المصير لدى ابنك/ ابنتك، ومشاركة الوالدين، ودعم معلمي صعوبات التعلم لهم، واستعدادهم للكلية أو المهنة

أنت/ أنت مدعو/ة للمشاركة في هذا الاستبيان، والمطلوب منك قراءة كل عبارة جيداً والاستجابة لها مع العلم أنه ليس هناك إجابة صحيحة وأخرى خاطئة، وتتراوح درجات الاستبانة بين 1 و 5.

الأقسام الرئيسية لهذا الاستبيان:

أ. معلومات عامة

ب. أسئلة حول قدرة تقرير المصير لدى ابنك/ ابنتك

ج. أسئلة حول مشاركتك في برنامج الخدمات الانتقالية الخاص بابنك/ابنتك.

د. أسئلة حول دعم معلمي صعوبات التعلم لتطوير مهارات ابنك/ابنتك غير الأكاديمية.

هـ- أسئلة حول استعداد ابنك/ابنتك للكلية أو العمل.

ستستغرق مشاركتك في الاستبانة ما بين 10 إلى 15 دقيقة

شكراً مقدماً على مشاركتكم.

الباحثة:

نوره صالح بن غشيان

Norah.alghashayan@gmail.com

القسم الأول: المعلومات الأولية:

الاسم: (اختياري):

الجنس:

♂ ذكر      ♀ أنثى

المستوى التعليمي:

♂ بكالوريوس      ♂ ماجستير      ♂ دكتورة

البريد الإلكتروني:

| القسم الثاني: مهارات تقرير المصير:                                                                                                                                                                                    |            |       |              |          |               |  |
|-----------------------------------------------------------------------------------------------------------------------------------------------------------------------------------------------------------------------|------------|-------|--------------|----------|---------------|--|
| وتعني قدرة ابنك/ابنتك على تحديد أهدافه/ها الشخصية، الأكاديمية والاجتماعية، وإيمانه/ها بقدرته/ها على تحقيقها، وأيضاً مقدرته/ها على مراقبة ذاته/ها، وتصرفه/ها باستقلالية، إلى جانب فهمه/ها لجوانب الضعف والقوة لديه/ها. |            |       |              |          |               |  |
| العبارة                                                                                                                                                                                                               | أوافق بشدة | أوافق | أوافق لحد ما | لا أوافق | لا أوافق بشدة |  |
| 1 يلتزم (ابني/ابنتي) دائماً بالحضور في الموعد المحدد بدون تأخير.                                                                                                                                                      |            |       |              |          |               |  |
| 2 يستطيع (ابني/ ابنتي) أن (يُحَصِّرَ/تَحَصِّرَ) وجبة خفيفة لنفسه/ها.                                                                                                                                                  |            |       |              |          |               |  |
| 3 يستطيع (ابني/ ابنتي) أن يختار/تختار ما يرتديه/ ما ترتديه من ملابس في مختلف المناسبات                                                                                                                                |            |       |              |          |               |  |
| 4 يستثمر (ابني/ ابنتي) أوقات الفراغ بما ينفعه.                                                                                                                                                                        |            |       |              |          |               |  |
| 5 يستطيع (ابني/ابنتي) أن ينفق مصروفه/ها بدون إشراف.                                                                                                                                                                   |            |       |              |          |               |  |
| 6 يستطيع (ابني/ ابنتي) أن يعبر/تعبر عن احتياجاته/ها المختلفة للأشخاص المناسبة.                                                                                                                                        |            |       |              |          |               |  |
| 7 يعرف (ابني/ ابنتي) نقاط القوة لديه/ها، ويستطيع أن يستغلها لتطوير ذاته/ها.                                                                                                                                           |            |       |              |          |               |  |
| 8 يستطيع (ابني/ ابنتي) أن يعبر عن مشاعر الفرح أو الحزن للآخرين بشكل مناسب في المواقف المختلفة                                                                                                                         |            |       |              |          |               |  |
| 9 لدى (ابني/ابنتي) أهداف للمستقبل قد تم التخطيط معا لتحقيقها.                                                                                                                                                         |            |       |              |          |               |  |
| 10 لدى (ابني/ابنتي) خطط بديلة في حال أن الخطة الأولى لم تنجح.                                                                                                                                                         |            |       |              |          |               |  |



|                                                                                                                                                                                                                                                                                                                            |                                                                                                 |  |  |  |  |
|----------------------------------------------------------------------------------------------------------------------------------------------------------------------------------------------------------------------------------------------------------------------------------------------------------------------------|-------------------------------------------------------------------------------------------------|--|--|--|--|
| 11                                                                                                                                                                                                                                                                                                                         | لدينا أنا و (ابني/ ابنتي) تصوّر لما (سيصبح عليه/ستصبح عليها) في الثلاث سنوات القادمة بإذن الله. |  |  |  |  |
| 12                                                                                                                                                                                                                                                                                                                         | لدى (ابني/ ابنتي) المقدرة على تعلّم أي هواية أو مهارة (يرغب/ترغب) في تعلمها " كالرسم، والطبخ."  |  |  |  |  |
| 13                                                                                                                                                                                                                                                                                                                         | لدى (ابني/ ابنتي) المقدرة على التعبير عن رأيه/ها بثقة للأصدقاء أو للآخرين.                      |  |  |  |  |
| 14                                                                                                                                                                                                                                                                                                                         | لدى (ابني/ ابنتي) المقدرة على التعاون مع الآخرين في العمل الجماعي بشكل مناسب.                   |  |  |  |  |
| 15                                                                                                                                                                                                                                                                                                                         | لدى (ابني/ ابنتي) المقدرة على تكوين صداقات في المدرسة أو النادي أو أي مكان آخر.                 |  |  |  |  |
| 16                                                                                                                                                                                                                                                                                                                         | لدى (ابني/ ابنتي) القدرة على فهم وتقبل آراء الآخرين، وإن لم يكن تكن مقتنع/ة به/ها               |  |  |  |  |
| 17                                                                                                                                                                                                                                                                                                                         | سَبَقَ أن شارك (ابني/ابنتي) في عمل تطوعي في المدرسة أو في أحد النوادي الصيفية.                  |  |  |  |  |
| <b>القسم الثالث: مشاركة الوالدين في الخدمات الانتقالية:</b><br>يقصد بمدى تفاعلك وتعاونك في برنامج الخدمات الانتقالية الخاص بك، وأخذ آراءك في مجموعة من الأنشطة والبرامج المصممة لتطوير ابنك/ابنتك في عدة جوانب المختلفة (أكاديميا نفسيا، اجتماعيا) وذلك من أجل تحقيق الأهداف المرجو تحقيقها لابنك/ابنتك وتفيدها بالمستقبل. |                                                                                                 |  |  |  |  |
| <b>العَبارة</b><br>أوافق بشدة      أوافق      أوافق لحد ما      لا أوافق      لا أوافق بشدة                                                                                                                                                                                                                                |                                                                                                 |  |  |  |  |
| 1                                                                                                                                                                                                                                                                                                                          | أتواصل بشكل دوري مع معلم صعوبات التعلم.                                                         |  |  |  |  |
| 2                                                                                                                                                                                                                                                                                                                          | أعرف ماهي الخدمات الانتقالية.                                                                   |  |  |  |  |
| 3                                                                                                                                                                                                                                                                                                                          | أنا راضٍ عن مستوى تقديم الخدمات الانتقالية المقدمة لـ(ابني/ ابنتي).                             |  |  |  |  |

|                                                                                                                                                                                                                                              |                                                                                                                                                   |       |              |               |  |
|----------------------------------------------------------------------------------------------------------------------------------------------------------------------------------------------------------------------------------------------|---------------------------------------------------------------------------------------------------------------------------------------------------|-------|--------------|---------------|--|
| 4                                                                                                                                                                                                                                            | أشارك في وضع الأهداف الخاصة ب(ابني/ابنتي) في برنامج الخدمات الانتقالية.                                                                           |       |              |               |  |
| 5                                                                                                                                                                                                                                            | يتم الأخذ برأيي ويُكتب ضمن التوصيات.                                                                                                              |       |              |               |  |
| 6                                                                                                                                                                                                                                            | أنا مهتم بمنح (ابني/ ابنتي) المهارات التي تعدّه للكلية أو المهنة المستقبلية.                                                                      |       |              |               |  |
| 7                                                                                                                                                                                                                                            | أشارك مع المدرسة الاهتمام بتنمية هذه المهارات.                                                                                                    |       |              |               |  |
| 8                                                                                                                                                                                                                                            | دائماً ما يشجع معلم صعوبات التعلم وإدارة المدرسة على مشاركتي في البرامج المقدمة ل(ابني/ابنتي) لتطويرهم في الجوانب المختلفة.                       |       |              |               |  |
| 9                                                                                                                                                                                                                                            | أعلم أن مشاركتي ضمن برنامج الخدمات الانتقالية هو أمر هام جداً لمصلحة (ابني/ابنتي).                                                                |       |              |               |  |
| <p><b>القسم الرابع: دعم معلمي صعوبات التعلم لتطوير مهارات التلميذ غير الأكاديمية:</b><br/> يقصد بها الممارسات أو الأساليب التربوية الفعالية التي يمارسها معلم صعوبات التعلم " لتطوير الجوانب الشخصية والاجتماعية والمهنية لدى ابنك/ابنتك</p> |                                                                                                                                                   |       |              |               |  |
| العبارة                                                                                                                                                                                                                                      |                                                                                                                                                   |       |              |               |  |
|                                                                                                                                                                                                                                              | أوافق بشدة                                                                                                                                        | أوافق | أوافق لحد ما | لا أوافق بشدة |  |
| 1                                                                                                                                                                                                                                            | يقدم (تقدم) معلم/ة صعوبات التعلم دورات أو محاضرات لتطوير مهارات (ابني/ ابنتي) الغير أكاديمية (كاستعداده/ها للجامعة أو المهنة، تقرير المصير، إلخ). |       |              |               |  |
| 2                                                                                                                                                                                                                                            | لا يتردد (ابني/ ابنتي) في مناقشة أهدافه/ها المستقبلية مع معلم/معلمة صعوبات التعلم.                                                                |       |              |               |  |
| 3                                                                                                                                                                                                                                            | لا يتردد (تتردد) معلم/ة صعوبات التعلم (ابني/ابنتي) في مساعدته/ها في الأمور غير الأكاديمية عندما يطلب (تطلب) منه /منها ذلك.                        |       |              |               |  |
| 4                                                                                                                                                                                                                                            | يطلعي (تطلعي) معلم/ة صعوبات التعلم بتطورات ابني/ ابنتي في الجوانب غير الأكاديمية، بناءً على الخطة المكتوبة له في برنامج الخدمات الانتقالية.       |       |              |               |  |

|                                                                                                                                                                                           |                                                                                                                                  |       |              |          |               |
|-------------------------------------------------------------------------------------------------------------------------------------------------------------------------------------------|----------------------------------------------------------------------------------------------------------------------------------|-------|--------------|----------|---------------|
| 5                                                                                                                                                                                         | يتواصل (تتواصل) معي معلم /ة صعوبات التعلم (ابني /ابنتي) لإعطائي نصائح فيما يحتاجه (ابني/ابنتي) من تطوير للمهارات الغير أكاديمية. |       |              |          |               |
| <b>القسم الخامس: الاستعداد الجامعي والمهني:</b><br>ويقصد به مدى استعدادك لمرحلة ما بعد الثانوية، ومدى معرفتك لمتطلبات الدراسة الجامعية أو العمل المهني، وأيضا مدى امتلاكك لهذه المتطلبات. |                                                                                                                                  |       |              |          |               |
| العبارة                                                                                                                                                                                   |                                                                                                                                  |       |              |          |               |
|                                                                                                                                                                                           | أوافق بشدة                                                                                                                       | أوافق | أوافق لحد ما | لا أوافق | لا أوافق بشدة |
| 1                                                                                                                                                                                         | لدي معرفة بالاستعداد الجامعي أو المهني لـ(ابني/ ابنتي)                                                                           |       |              |          |               |
| 2                                                                                                                                                                                         | ينبغي أن تهتم المدارس الثانوية بتطوير الاستعداد الجامعي أو المهني لـ(ابني/ ابنتي) من ذوي صعوبات التعلم ولأقرانهم العاديين.       |       |              |          |               |
| 3                                                                                                                                                                                         | أجعل (ابني/ابنتي) يشارك/ تشارك في دورات أو برامج صيفية لتطوير استعداده/ها الجامعي أو المهني.                                     |       |              |          |               |
| 4                                                                                                                                                                                         | أنا راضٍ عن استعداد (ابني/ابنتي) الجامعي أو المهني.                                                                              |       |              |          |               |
| 5                                                                                                                                                                                         | أعرف جيداً ماهي متطلبات ابني (ابنتي) للدراسة الجامعية أو العمل المهني والتي تتوافق مع قدراته/ها.                                 |       |              |          |               |

استبيان حول تقرير المصير، والمشاركة الوالدية في برنامج صعوبات التعلم، ودعم معلمي صعوبات التعلم في المهارات الغير أكاديمية، والاستعداد للكلية أو المهنة لدى تلميذات /تلاميذ الثانوية من ذوي صعوبات التعلم من وجهة نظر معلمي صعوبات التعلم.

عزيزي/تي معلم/ة صعوبات التعلم

السلام عليكم ورحمة الله وبركاته

بداية أشكر لك سلفاً على تفضلك بالاستجابة إلى عبارات هذه الاستبانة التي تهدف إلى التعرف على العلاقة بين تقرير مصير لدى تلميذك/تلميذتك، والمشاركة الوالدية، ودعمك للجوانب الغير اكايدمية كتنوير مهارات تقرير المصير والاستعداد للكلية أو المهني، وأيضاً استعداد تلميذك/ تلميذتك للكلية أو المهنة

أنت/ انت مدعو للمشاركة في هذا الاستبيان، والمطلوب منك قراءة كل عبارة جيداً والاستجابة لها مع العلم أنه ليس هناك إجابة صحيحة وأخرى خاطئة، وتتراوح درجات الاستبانة بين 1 و 5.

الأقسام الرئيسية لهذا الاستبيان:

أ. معلومات عامة

ب. أسئلة حول تقرير المصير لدى تلاميذك/تلميذتك

ج. أسئلة حول مشاركة الوالدين في الخدمات الانتقالية.

د. أسئلة حول دعمك لتنمية المهارات غير الأكاديمية لدى تلاميذك/تلميذتك ذوي صعوبات التعلم.

هـ. أسئلة حول استعدادك تلاميذك/تلميذتك للكلية أو العمل.

ستستغرق مشاركتك في الاستبانة ما بين 10 إلى 15 دقيقة.

شكراً مقدماً على مشاركتكم.

الباحثة

نوره صالح بن غشيان

[norah.alghashayan@gmail.com](mailto:norah.alghashayan@gmail.com)

القسم الأول: المعلومات الأولية:

الاسم: (اختياري):

الجنس:

ذكر ☐ أنثى ☐

المستوى التعليمي:

بكالوريوس ☐ ماجستير ☐ دكتوراه ☐

سنوات الخبرة:

سنة إلى سنوات ☐ 5 سنوات إلى 10 سنوات ☐ أكثر من 10 سنوات ☐

العنوان الإلكتروني:

| القسم الثاني: مهارات تقرير المصير: |                                                                                                                      | وتعني قدرة التلميذ/ة على تحديد أهدافه/ها الشخصية، الأكاديمية والاجتماعية، وإيمانه/ها بقدرته/ها على تحقيقها، وأيضاً مقدرته/ها على مراقبة ذاته/ها، وتصرفه/ها باستقلالية، إلى جانب فهمه/ها لجوانب الضعف والقوة لديه/ها. |       |              |          |               |
|------------------------------------|----------------------------------------------------------------------------------------------------------------------|----------------------------------------------------------------------------------------------------------------------------------------------------------------------------------------------------------------------|-------|--------------|----------|---------------|
| العبارة                            |                                                                                                                      | أوافق بشدة                                                                                                                                                                                                           | أوافق | أوافق لحد ما | لا أوافق | لا أوافق بشدة |
| 1                                  | تحتوي الأهداف التي تم وضعها لتلاميذي ذوي صعوبات التعلم في برنامج الخدمات الانتقالية على تطوير مهارات تقرير المصير.   |                                                                                                                                                                                                                      |       |              |          |               |
| 2                                  | أطبق مقياساً على تلاميذي ذوي صعوبات التعلم يقيس مهاراتهم في تقرير المصير.                                            |                                                                                                                                                                                                                      |       |              |          |               |
| 3                                  | أساعد التلميذ كيفية اختيار الاستراتيجية الصحيحة لتحقيق الهدف، وتغييرها عندما تفشل في تحقيق الهدف المحدد.             |                                                                                                                                                                                                                      |       |              |          |               |
| 4                                  | يتم رصد مدى تطور مهارات تلاميذي ذوي صعوبات التعلم في تقرير المصير بشكل دوري.                                         |                                                                                                                                                                                                                      |       |              |          |               |
| 5                                  | يجب أن يكون لدى تلميذ صعوبات التعلم في المدارس الثانوية مهارات تقرير المصير.                                         |                                                                                                                                                                                                                      |       |              |          |               |
| 6                                  | لدي استراتيجيات داعمة أطبقها على تلاميذي/تلميذاتي لتطوير مهاراتهم في تقرير المصير.                                   |                                                                                                                                                                                                                      |       |              |          |               |
| 7                                  | أساعد تلاميذي/تلميذاتي على تعميم مهارات تقرير المصير في المواقف المختلفة داخل المدرسة، والبيت، أو في الأماكن العامة. |                                                                                                                                                                                                                      |       |              |          |               |
| 8                                  | أحرص عند كتابة التوصيات في خطة التلميذ/ة ذوي صعوبات التعلم على تطوير مهارات تقرير المصير عند تلاميذي/تلميذاتي.       |                                                                                                                                                                                                                      |       |              |          |               |

|                                                                                                                                                                                                                                                                                                                                                          |                                                                                                                    |  |  |  |  |
|----------------------------------------------------------------------------------------------------------------------------------------------------------------------------------------------------------------------------------------------------------------------------------------------------------------------------------------------------------|--------------------------------------------------------------------------------------------------------------------|--|--|--|--|
| 9                                                                                                                                                                                                                                                                                                                                                        | أساعد تلميذة/ة ذوي صعوبات التعلم على كيفية تحديد الأولويات.                                                        |  |  |  |  |
| 10                                                                                                                                                                                                                                                                                                                                                       | أساعد تلاميذي/تلميذاتي في كيفية التحقق من كفاءته/ها في إدارة الوقت عند أداء الواجبات والمهام اليومية.              |  |  |  |  |
| <b>القسم الثالث: مشاركة الوالدين في الخدمات الانتقالية:</b><br>يقصد بمدى تفاعل أحد الوالدين في برنامج الخدمات الانتقالية الخاص بابنه/ابنته من ذوي صعوبات التعلم، وأخذ آرائه في مجموعة من الأنشطة والبرامج المصممة لتطوير ابنه/ابنته في عدة جوانب المختلفة (أكاديميا نفسيا، اجتماعيا) وذلك من أجل تحقيق الأهداف المرجو تحقيقها له/ها وتفيده/ها بالمستقبل. |                                                                                                                    |  |  |  |  |
| <b>العبارة</b><br>أوافق بشدة      أوافق      أوافق لحد ما      لا أوافق      لا أوافق بشدة                                                                                                                                                                                                                                                               |                                                                                                                    |  |  |  |  |
| 1                                                                                                                                                                                                                                                                                                                                                        | يتم تقييم احتياجات التلميذة/ة ذو صعوبات التعلم في الخطة الانتقالية بمشاركة أحد الوالدين.                           |  |  |  |  |
| 2                                                                                                                                                                                                                                                                                                                                                        | يتم تحديد قدرات التلميذة/ة أو "نقاط قوته" في الخطة الانتقالية بمشاركة أولياء الأمور.                               |  |  |  |  |
| 3                                                                                                                                                                                                                                                                                                                                                        | تؤخذ رغبات وأفضليات وآراء أولياء أمور التلميذ في الاعتبار عند إعداد خطة الانتقال.                                  |  |  |  |  |
| 4                                                                                                                                                                                                                                                                                                                                                        | يشارك أحد الوالدين في تحقيق الأهداف المخطط لها في الخدمات الانتقالية.                                              |  |  |  |  |
| 5                                                                                                                                                                                                                                                                                                                                                        | يراقب أحد الوالدين تقدم التلميذ في الخطة الانتقالية، والتي يتم تقييمها بشكل دوري في (بداية، ومنتصف، ونهاية) السنة. |  |  |  |  |
| 6                                                                                                                                                                                                                                                                                                                                                        | يشارك أحد الوالدين في كتابة التوصيات التي تحدد الأهداف المنجزة وغير المنجزة.                                       |  |  |  |  |
| <b>القسم الرابع: دعم معلمي/معلمات صعوبات التعلم لتطوير المهارات غير الأكاديمية:</b><br>يقصد بها الممارسات أو الأساليب التربوية الفعالية التي تمارسها (تمارسينها) لتطوير الجوانب الشخصية والاجتماعية والمهنية لدى تلميذك/تلميذتك من ذوي صعوبات التعلم.                                                                                                    |                                                                                                                    |  |  |  |  |

| العبارة                                                                                                                                                                                                                    |                                                                                                                                         | أوافق بشدة | أوافق | أوافق لحد ما | لا أوافق | لا أوافق بشدة |
|----------------------------------------------------------------------------------------------------------------------------------------------------------------------------------------------------------------------------|-----------------------------------------------------------------------------------------------------------------------------------------|------------|-------|--------------|----------|---------------|
| 1                                                                                                                                                                                                                          | أقدم دورات وورش عمل تساعد التلميذ على تقرير المصير والاستعداد الجامعي والمهني.                                                          |            |       |              |          |               |
| 2                                                                                                                                                                                                                          | أدعم التلميذ عندما يكون لديه مشكلة نفسية أو غير أكاديمية.                                                                               |            |       |              |          |               |
| 3                                                                                                                                                                                                                          | أتواصل مع أحد والدي التلميذ/ة لتقديم أفضل الحلول لمشاكله/ها.                                                                            |            |       |              |          |               |
| 4                                                                                                                                                                                                                          | أطلع أحد الوالدين بتطورات ابنه/ ابنته في الجوانب غير الأكاديمية، بناءً على الخطة المحددة له في برنامج الخدمات الانتقالية.               |            |       |              |          |               |
| 5                                                                                                                                                                                                                          | أتواصل بشكل دوري مع معلمي فصول التعليم العام لدعم تلاميذي/تلاميذي نفسيا أو اجتماعيا.                                                    |            |       |              |          |               |
| <b>القسم الخامس: الاستعداد الجامعي والمهني:</b><br>ويقصد به مدى استعداد التلميذ/ة ذوي صعوبات التعلم لمرحلة ما بعد الثانوية، ومدى معرفته/ها لمتطلبات الدراسة الجامعية أو العمل المهني، وأيضا مدى امتلاكه/ها لهذه المتطلبات. |                                                                                                                                         |            |       |              |          |               |
| العبارة                                                                                                                                                                                                                    |                                                                                                                                         | أوافق بشدة | أوافق | أوافق لحد ما | لا أوافق | لا أوافق بشدة |
| 1                                                                                                                                                                                                                          | تشمل الأهداف المحددة في البرنامج للتلميذ/ة تطوير استعداده الجامعي والمهني.                                                              |            |       |              |          |               |
| 2                                                                                                                                                                                                                          | هناك "مقياس، اختبار" يحدد استعداد التلميذ/ة الجامعي أو المهني.                                                                          |            |       |              |          |               |
| 3                                                                                                                                                                                                                          | أتابع مع معلمي/معلمات التعليم العام كيفية تطوير استعداد التلميذ الجامعي والمهني، ومدى استعداده كجزء من أهداف برنامج الخدمات الانتقالية. |            |       |              |          |               |



|  |  |  |  |  |                                                                                                     |   |
|--|--|--|--|--|-----------------------------------------------------------------------------------------------------|---|
|  |  |  |  |  | أشارك تلاميذي/ تلميذاتي في دورات أو برامج صيفية أو ما بعد المدرسة لتطوير الاستعداد الجامعي والمهني. | 4 |
|  |  |  |  |  | أساعد تلاميذي/ تلميذاتي على معرفة مدى استعدادهم الجامعي والمهني.                                    | 5 |
